# Supplementary material for: Bidirectional Associations across Time between Entitativity, Positive Affect, Generosity, and Religiousness in Adolescents Training with a Religiously Affiliated Charity Marathon Team
Source: PubMed Central journal article supplement (PMC7037786; doi:10.3390/ijerph17030686), 2020-01-21
Supplement: ijerph-17-00686-s001.pdf [file ijerph-17-00686-s001.pdf]

Online Supplement Materials to Accompany

Supplemental Table 1. Full results from final autoregressive models.

|                          | Intrinsic Religiousness | Entitativity    | Positive Affectivity | Interpersonal Generosity | Fundraising     |
|--------------------------|-------------------------|-----------------|----------------------|--------------------------|-----------------|
| <b>Regressed on T2</b>   |                         |                 |                      |                          |                 |
| Intrinsic Religiousness  | 0.91, p < .001          | -0.12, p = .049 | 0.05, p = .479       | 0.17, p = .016           | 0.08, p = .174  |
| Entitativity             | -0.03, p = .481         | 0.50, p < .001  | 0.01, p = .862       | 0.03, p = .564           | -0.11, p = .133 |
| Positive Affectivity     | 0.08, p = .088          | 0.11, p = .164  | 0.78, p < .001       | 0.19, p = .053           | -0.06, p = .453 |
| Interpersonal Generosity | 0.05, p = .307          | 0.02, p = .704  | -0.08, p = .222      | 0.46, p < .001           | 0.19, p = .016  |
| SES                      | -                       | -               | -                    | -                        | 0.14, p = .008  |
| <b>Regressed on T1</b>   |                         |                 |                      |                          |                 |
| Intrinsic Religiousness  | 0.93, p < .001          | -0.09, p = .161 | 0.08, p = .239       | 0.01, p = .108           |                 |
| Entitativity             | 0.05, p = .129          | 0.31, p < .001  | 0.06, p = .277       | -0.05, p = .453          |                 |
| Positive Affectivity     | 0.01, p = .745          | 0.15, p = .053  | 0.59, p < .001       | 0.00, p = .948           |                 |
| Interpersonal Generosity | -0.03, p = .482         | 0.04, p = .603  | 0.19, p = .018       | 0.64, p < .001           |                 |
| SES                      | 0.08, p = .208          | -0.04, p = .423 | 0.15, p = .01        | -0.01, p = .831          |                 |

\* Note. Confidence intervals are not available in *Mplus* when using full information maximum likelihood estimation with robust standard errors. .

## Syntax for Autoregressive Models

*Title: Full Model*

DATA: File is mplustake2.dat;  
 Variable: NAMES ARE ExternalDataReference sample  
 T1there T2there T3there T4there  
 Times T1weeks T2weeks T3weeks T4weeks T1weeksprop  
 T2weeksprop T3weeksprop T4weeksprop T1\_2weeks T2\_3weeks T3\_4weeks  
 TIME1 Finished Age Gender Eth RelTrad  
 BelGod Grade Fathwork Mothwork Relation Edmom  
 Eddad Wealth Moves STI1 STI2 STI3  
 STI4 STI5 STI6 STI7 STI8 DUREL1  
 DUREL2 DUREL3 DUREL4 DUREL5 GCQ1 GCQ2  
 GCQ3 GCQ4 GCQ5 SC1 SC2 SC3  
 SC4 SC5 SC6 SC7 SC8 SC9  
 SC10 SC11 SC12 SC13 SC14 SC15  
 SC16 SC17 SC18 SC19 SC20 SC21  
 SC22 SC23 SC24 SC25 SC26 SC27  
 SC28 SC29 SC30 SC31 SC32 SC33  
 SC34 SC35 SC36 PQ1 PQ2 PQ3  
 PQ4 PQ5 PQ6 PQ7 PQ8 PQ9  
 PQ10 PQ11 GRB1 GRB2 GRB3 GRB4  
 GRB5 GRB6 GRB7 GRB8 GRB9 GRB10  
 GRB11 GRB12 GRB13 GRB14 GRB15 GRB16  
 ERQ1 ERQ2 ERQ3 ERQ4 ERQ5 ERQ6  
 ERQ7 ERQ8 ERQ9 ERQ10 ERQ11 ERQ12  
 ERQ13 ERQ14 ERQ15 IGS1 IGS2 IGS3  
 IGS4 IGS5 IGS6 IGS7 IGS8 IGS9  
 IGS10 SWLS1 SWLS2 SWLS3 SWLS4 SWLS5  
 YRBSS1 YRBSS2 YRBSS3 YRBSS4 YRBSS5 YRBSS6  
 YRBSS7 YRBSS8 YRBSS9 YRBSS10 YRBSS11 YRBSS12  
 YRBSS13 YRBSS14 YRBSS15 CSW1 CSW2 CSW3  
 CSW4 CSW5 CSW6 CSW7 CSW8 CSW9  
 CSW10 CSW11 CSW12 CSW13 CSW14 CSW15  
 PANAS1 PANAS2 PANAS3 PANAS4 PANAS5 PANAS6  
 PANAS7 PANAS8 PANAS9 PANAS10 GE1\_T1 MTTWV1  
 MTTWV2 MTTWV3 saddys sadreg angdys angreg  
 posaff\_T1 negaff\_T1 compcsw godcsw valcsw SWLS\_Score  
 PQ7r PQ10r PQ\_Interpersonal PQ\_LifeHardship PQ\_DailyHassles PQ\_Total  
 SC2r SC3r SC4r SC6r SC8r SC9r  
 SC10r SC11r SC12r SC14r SC16r SC17r  
 SC19r SC20r SC21r SC23r SC25r SC28r  
 SC29r SC31r SC32r SC33r SC34r SC35r  
 SC intgen\_T1 yrbtob yrbss10r yrbss13r yrbss14r  
 yrbdiet yrphysact GRB3R GRB4R GRB5R GRB7R  
 GRB15R GRBTOT IR\_T1 STI\_tot Gwatch TIME2  
 Finished\_T2 DUREL1\_T2 DUREL2\_T2 DUREL3\_T2 DUREL4\_T2 DUREL5\_T2  
 STI1\_T2 STI2\_T2 STI3\_T2 STI4\_T2 STI5\_T2 STI6\_T2  
 STI7\_T2 STI8\_T2 GCQ1\_T2 GCQ2\_T2 GCQ3\_T2 GCQ4\_T2  
 GCQ5\_T2 SC1\_T2 SC2\_T2 SC3\_T2 SC4\_T2 SC5\_T2  
 SC6\_T2 SC7\_T2 SC8\_T2 SC9\_T2 SC10\_T2 SC11\_T2  
 SC12\_T2 SC13\_T2 SC14\_T2 SC15\_T2 SC16\_T2 SC17\_T2

SC18\_T2 SC19\_T2 SC20\_T2 SC21\_T2 SC22\_T2 SC23\_T2  
SC24\_T2 SC25\_T2 SC26\_T2 SC27\_T2 SC28\_T2 SC29\_T2  
SC30\_T2 SC31\_T2 SC32\_T2 SC33\_T2 SC34\_T2 SC35\_T2  
SC36\_T2 PQ1\_T2 PQ2\_T2 PQ3\_T2 PQ4\_T2 PQ5\_T2  
PQ6\_T2 PQ7\_T2 PQ8\_T2 PQ9\_T2 PQ10\_T2 PQ11\_T2  
GRB1\_T2 GRB2\_T2 GRB3\_T2 GRB4\_T2 GRB5\_T2 GRB6\_T2  
GRB7\_T2 GRB8\_T2 GRB9\_T2 GRB10\_T2 GRB11\_T2 GRB12\_T2  
GRB13\_T2 GRB14\_T2 GRB15\_T2 GRB16\_T2 ERQ1\_T2 ERQ2\_T2  
ERQ3\_T2 ERQ4\_T2 ERQ5\_T2 ERQ6\_T2 ERQ7\_T2 ERQ8\_T2  
ERQ9\_T2 ERQ10\_T2 ERQ11\_T2 ERQ12\_T2 ERQ13\_T2 ERQ14\_T2  
ERQ15\_T2 IGS1\_T2 IGS2\_T2 IGS3\_T2 IGS4\_T2 IGS5\_T2  
IGS6\_T2 IGS7\_T2 IGS8\_T2 IGS9\_T2 IGS10\_T2 SWLS1\_T2  
SWLS2\_T2 SWLS3\_T2 SWLS4\_T2 SWLS5\_T2 YRBSS1\_T2 YRBSS2\_T2  
YRBSS3\_T2 YRBSS4\_T2 YRBSS5\_T2 YRBSS6\_T2 YRBSS7\_T2 YRBSS8\_T2  
YRBSS9\_T2 YRBSS10\_T2 YRBSS11\_T2 YRBSS12\_T2 YRBSS13\_T2 YRBSS14\_T2  
YRBSS15\_T2 CSW1\_T2 CSW2\_T2 CSW3\_T2 CSW4\_T2 CSW5\_T2  
CSW6\_T2 CSW7\_T2 CSW8\_T2 CSW9\_T2 CSW10\_T2 CSW11\_T2  
CSW12\_T2 CSW13\_T2 CSW14\_T2 CSW15\_T2 PANAS1\_T2 PANAS2\_T2  
PANAS3\_T2 PANAS4\_T2 PANAS5\_T2 PANAS6\_T2 PANAS7\_T2 PANAS8\_T2  
PANAS9\_T2 PANAS10\_T2 GE1\_T2 PrevRace\_T2 PrevRaceNum\_T2 PrevRaceType\_T2  
MTTWV1\_T2 MTTWV2\_T2 MTTWV3\_T2 saddys\_T2 sadreg\_T2 angdys\_T2  
angreg\_T2 posaff\_T2 negaff\_T2 compcsw\_T2 godcsw\_T2 valcsw\_T2  
SWLS\_Score\_T2 PQ7r\_T2 PQ10r\_T2 PQ\_Interpersonal\_T2  
PQ\_LifeHardship\_T2 PQ\_DailyHassles\_T2  
PQ\_Total\_T2 SC2r\_T2 SC3r\_T2 SC4r\_T2 SC6r\_T2 SC8r\_T2  
SC9r\_T2 SC10r\_T2 SC11r\_T2 SC12r\_T2 SC14r\_T2 SC16r\_T2  
SC17r\_T2 SC19r\_T2 SC20r\_T2 SC21r\_T2 SC23r\_T2 SC25r\_T2  
SC28r\_T2 SC29r\_T2 SC31r\_T2 SC32r\_T2 SC33r\_T2 SC34r\_T2  
SC35r\_T2 SC\_T2 intgen\_T2 yrbtob\_T2 yrbss10r\_T2 yrbss13r\_T2  
yrbss14r\_T2 yrbdiet\_T2 yrbphysact\_T2 GRB3R\_T2 GRB4R\_T2 GRB5R\_T2  
GRB7R\_T2 GRB15R\_T2 GRBTOT\_T2 IR\_T2 STI\_tot\_T2 Gwatch\_T2  
TIME3 Finished\_T3 DUREL1\_T3 DUREL2\_T3 DUREL3\_T3 DUREL4\_T3  
DUREL5\_T3 STI1\_T3 STI2\_T3 STI3\_T3 STI4\_T3 STI5\_T3  
STI6\_T3 STI7\_T3 STI8\_T3 GCQ1\_T3 GCQ2\_T3 GCQ3\_T3  
GCQ4\_T3 GCQ5\_T3 SC1\_T3 SC2\_T3 SC3\_T3 SC4\_T3  
SC5\_T3 SC6\_T3 SC7\_T3 SC8\_T3 SC9\_T3 SC10\_T3  
SC11\_T3 SC12\_T3 SC13\_T3 SC14\_T3 SC15\_T3 SC16\_T3  
SC17\_T3 SC18\_T3 SC19\_T3 SC20\_T3 SC21\_T3 SC22\_T3  
SC23\_T3 SC24\_T3 SC25\_T3 SC26\_T3 SC27\_T3 SC28\_T3  
SC29\_T3 SC30\_T3 SC31\_T3 SC32\_T3 SC33\_T3 SC34\_T3  
SC35\_T3 SC36\_T3 PQ1\_T3 PQ2\_T3 PQ3\_T3 PQ4\_T3  
PQ5\_T3 PQ6\_T3 PQ7\_T3 PQ8\_T3 PQ9\_T3 PQ10\_T3  
PQ11\_T3 GRB1\_T3 GRB2\_T3 GRB3\_T3 GRB4\_T3 GRB5\_T3  
GRB6\_T3 GRB7\_T3 GRB8\_T3 GRB9\_T3 GRB10\_T3 GRB11\_T3  
GRB12\_T3 GRB13\_T3 GRB14\_T3 GRB15\_T3 GRB16\_T3 ERQ1\_T3  
ERQ2\_T3 ERQ3\_T3 ERQ4\_T3 ERQ5\_T3 ERQ6\_T3 ERQ7\_T3  
ERQ8\_T3 ERQ9\_T3 ERQ10\_T3 ERQ11\_T3 ERQ12\_T3 ERQ13\_T3  
ERQ14\_T3 ERQ15\_T3 IGS1\_T3 IGS2\_T3 IGS3\_T3 IGS4\_T3  
IGS5\_T3 IGS6\_T3 IGS7\_T3 IGS8\_T3 IGS9\_T3 IGS10\_T3  
SWLS1\_T3 SWLS2\_T3 SWLS3\_T3 SWLS4\_T3 SWLS5\_T3 YRBSS1\_T3  
YRBSS2\_T3 YRBSS3\_T3 YRBSS4\_T3 YRBSS5\_T3 YRBSS6\_T3 YRBSS7\_T3  
YRBSS8\_T3 YRBSS9\_T3 YRBSS10\_T3 YRBSS11\_T3 YRBSS12\_T3 YRBSS13\_T3

YRBSS14\_T3 YRBSS15\_T3 CSW1\_T3 CSW2\_T3 CSW3\_T3 CSW4\_T3  
CSW5\_T3 CSW6\_T3 CSW7\_T3 CSW8\_T3 CSW9\_T3 CSW10\_T3  
CSW11\_T3 CSW12\_T3 CSW13\_T3 CSW14\_T3 CSW15\_T3 PANAS1\_T3  
PANAS2\_T3 PANAS3\_T3 PANAS4\_T3 PANAS5\_T3 PANAS6\_T3 PANAS7\_T3  
PANAS8\_T3 PANAS9\_T3 PANAS10\_T3 GE1\_T3 PrevRace\_T3 PrevRaceNum\_T3  
PrevRaceType\_T3 MTTWV1\_T3 MTTWV2\_T3 MTTWV3\_T3 saddys\_T3 sadreg\_T3  
angdys\_T3 angreg\_T3 posaff\_T3 negaff\_T3 compcsw\_T3 godcsw\_T3  
valcsw\_T3 SWLS\_Score\_T3 PQ7r\_T3 PQ10r\_T3 PQ\_Interpersonal\_T3  
PQ\_LifeHardship\_T3  
PQ\_DailyHassles\_T3 PQ\_Total\_T3 SC2r\_T3 SC3r\_T3 SC4r\_T3 SC6r\_T3  
SC8r\_T3 SC9r\_T3 SC10r\_T3 SC11r\_T3 SC12r\_T3 SC14r\_T3  
SC16r\_T3 SC17r\_T3 SC19r\_T3 SC20r\_T3 SC21r\_T3 SC23r\_T3  
SC25r\_T3 SC28r\_T3 SC29r\_T3 SC31r\_T3 SC32r\_T3 SC33r\_T3  
SC34r\_T3 SC35r\_T3 SC\_T3 intgen\_T3 yrbtob\_T3 yrbss10r\_T3  
yrbss13r\_T3 yrbss14r\_T3 yrbdiet\_T3 yrbphysact\_T3 GRB3R\_T3 GRB4R\_T3  
GRB5R\_T3 GRB7R\_T3 GRB15R\_T3 GRBTOT\_T3 IR\_T3 STI\_tot\_T3  
Gwatch\_T3 RanRace TIME4 Finished\_T4 DUREL\_T4 DUREL1\_T4  
DUREL2\_T4 DUREL3\_T4 DUREL4\_T4 DUREL5\_T4 STI1\_T4 STI2\_T4  
STI3\_T4 STI4\_T4 STI5\_T4 STI6\_T4 STI7\_T4 STI8\_T4  
GCQ1\_T4 GCQ2\_T4 GCQ3\_T4 GCQ4\_T4 GCQ5\_T4 SC1\_T4  
SC2\_T4 SC3\_T4 SC4\_T4 SC5\_T4 SC6\_T4 SC7\_T4  
SC8\_T4 SC9\_T4 SC10\_T4 SC11\_T4 SC12\_T4 SC13\_T4  
SC14\_T4 SC15\_T4 SC16\_T4 SC17\_T4 SC18\_T4 SC19\_T4  
SC20\_T4 SC21\_T4 SC22\_T4 SC23\_T4 SC24\_T4 SC25\_T4  
SC26\_T4 SC27\_T4 SC28\_T4 SC29\_T4 SC30\_T4 SC31\_T4  
SC32\_T4 SC33\_T4 SC34\_T4 SC35\_T4 SC36\_T4 PQ1\_T4  
PQ2\_T4 PQ3\_T4 PQ4\_T4 PQ5\_T4 PQ6\_T4 PQ7\_T4  
PQ8\_T4 PQ9\_T4 PQ10\_T4 PQ11\_T4 GRB1\_T4 GRB2\_T4  
GRB3\_T4 GRB4\_T4 GRB5\_T4 GRB6\_T4 GRB7\_T4 GRB8\_T4  
GRB9\_T4 GRB10\_T4 GRB11\_T4 GRB12\_T4 GRB13\_T4 GRB14\_T4  
GRB15\_T4 GRB16\_T4 ERQ1\_T4 ERQ2\_T4 ERQ3\_T4 ERQ4\_T4  
ERQ5\_T4 ERQ6\_T4 ERQ7\_T4 ERQ8\_T4 ERQ9\_T4 ERQ10\_T4  
ERQ11\_T4 ERQ12\_T4 ERQ13\_T4 ERQ14\_T4 ERQ15\_T4 IG1\_T4  
IG2\_T4 IG3\_T4 IG4\_T4 IG5\_T4 IG6\_T4 IG7\_T4  
IG8\_T4 IG9\_T4 IG10\_T4 SWLS1\_T4 SWLS2\_T4 SWLS3\_T4  
SWLS4\_T4 SWLS5\_T4 YRBSS1\_T4 YRBSS2\_T4 YRBSS3\_T4 YRBSS4\_T4  
YRBSS5\_T4 YRBSS6\_T4 YRBSS7\_T4 YRBSS8\_T4 YRBSS9\_T4 YRBSS10\_T4  
YRBSS11\_T4 YRBSS12\_T4 YRBSS13\_T4 YRBSS14\_T4 YRBSS15\_T4 CSW1\_T4  
CSW2\_T4 CSW3\_T4 CSW4\_T4 CSW5\_T4 CSW6\_T4 CSW7\_T4  
CSW8\_T4 CSW9\_T4 CSW10\_T4 CSW11\_T4 CSW12\_T4 CSW13\_T4  
CSW14\_T4 CSW15\_T4 PANAS1\_T4 PANAS2\_T4 PANAS3\_T4 PANAS4\_T4  
PANAS5\_T4 PANAS6\_T4 PANAS7\_T4 PANAS8\_T4 PANAS9\_T4 PANAS10\_T4  
GE2\_T4 MT3401\_T4 MT3402\_T4 MT3403\_T4 TOA2FU6\_T4 TOA2FU7\_T4  
saddys\_T4 sadreg\_T4 angdys\_T4 angreg\_T4 posaff\_T4 negaff\_T4  
compcsw\_T4 godcsw\_T4 valcsw\_T4 SWLS\_Score\_T4 PQ7r\_T4 PQ10r\_T4  
PQ\_Interpersonal\_T4 PQ\_LifeHardship\_T4 PQ\_DailyHassles\_T4  
PQ\_Total\_T4 SC2r\_T4 SC3r\_T4  
SC4r\_T4 SC6r\_T4 SC8r\_T4 SC9r\_T4 SC10r\_T4 SC11r\_T4  
SC12r\_T4 SC14r\_T4 SC16r\_T4 SC17r\_T4 SC19r\_T4 SC20r\_T4  
SC21r\_T4 SC23r\_T4 SC25r\_T4 SC28r\_T4 SC29r\_T4 SC31r\_T4  
SC32r\_T4 SC33r\_T4 SC34r\_T4 SC35r\_T4 SC\_T4 SC\_T4c  
intgen\_T4 PQTot\_T4 PQ\_Int\_T4 PQ\_LH\_T4 PQ\_DH\_T4 yrbtob\_T4

yrbss10r\_T4 yrbss13r\_T4 yrbss14r\_T4 yrbdiet\_T4 yrbphysact\_T4 GRB3R\_T4  
 GRB4R\_T4 GRB5R\_T4 GRB7R\_T4 GRB15R\_T4 GRBTOT\_T4 IR\_T4  
 STI\_tot\_T4 Gwatch\_T4 GROUPEENTITATIVITY GE\_cl\_t1 GE\_centeredness GE\_cl\_T2  
 GE\_centeredness\_T2 GE\_cl\_T3 GE\_centeredness\_T3 GE\_CLOSENESS\_T4  
 GE\_CENTEREDNESS\_T4 TRAINING  
 Finished\_L1 TrainingLog\_L1 TL1\_L1 TL2\_L1 TL3\_L1 TL4\_L1  
 TL5\_L1 TL6\_L1 TL7\_L1 Finished\_L2 TrainingLog\_L2 TL1\_L2  
 TL2\_L2 TL3\_L2 TL4\_L2 TL5\_L2 TL6\_L2 TL7\_L2  
 Finished\_L3 TrainingLog\_L3 TL1\_L3 TL2\_L3 TL3\_L3 TL4\_L3  
 TL5\_L3 TL6\_L3 TL7\_L3 Finished\_L4 TrainingLog\_L4 TL1\_L4  
 TL2\_L4 TL3\_L4 TL4\_L4 TL5\_L4 TL6\_L4 TL7\_L4  
 FUNDING FundTot FundNum tmotiv tclose Emreg\_T1  
 Emreg\_T2 Emreg\_T3 Emreg\_T4 GRBTOT\_T1 Phi\_T1 Phi\_T2  
 Phi\_T3 Phi\_T4 Emregr\_t1 Emregr\_t2 Emregr\_t3 Emregr\_t4  
 sadregr\_t1 sadregr\_t2 sadregr\_t3 sadregr\_t4 SC2\_T2R SC3\_T2R  
 SC4\_T2R SC6\_T2R SC8\_T2R SC9\_T2R SC10\_T2R SC11\_T2R  
 SC12\_T2R SC14\_T2R SC16\_T2R SC17\_T2R SC19\_T2R SC20\_T2R  
 SC21\_T2R SC23\_T2R SC25\_T2R SC28\_T2R SC29\_T2R SC31\_T2R  
 SC32\_T2R SC33\_T2R SC34\_T2R SC35\_T2R SC2\_T3R SC3\_T3R  
 SC4\_T3R SC6\_T3R SC8\_T3R SC9\_T3R SC10\_T3R SC11\_T3R  
 SC12\_T3R SC14\_T3R SC16\_T3R SC17\_T3R SC19\_T3R SC20\_T3R  
 SC21\_T3R SC23\_T3R SC25\_T3R SC28\_T3R SC29\_T3R SC31\_T3R  
 SC32\_T3R SC33\_T3R SC34\_T3R SC35\_T3R SC2\_T4R SC3\_T4R  
 SC4\_T4R SC6\_T4R SC8\_T4R SC9\_T4R SC10\_T4R SC11\_T4R  
 SC12\_T4R SC14\_T4R SC16\_T4R SC17\_T4R SC19\_T4R SC20\_T4R  
 SC21\_T4R SC23\_T4R SC25\_T4R SC28\_T4R SC29\_T4R SC31\_T4R  
 SC32\_T4R SC33\_T4R SC34\_T4R SC35\_T4R FUNDNEW INTGN\_T1  
 INTGN\_T2 INTGN\_T3 AgeGr;

#### USEVariables ARE

PANAS10  
 PANAS10\_T2  
 PANAS10\_T3  
 GE\_cl\_T1 GE\_cl\_T2 GE\_cl\_T3  
 FUNDNEW wealth  
 IGP1 IGP2 IGP3  
 IGP1\_T2 IGP2\_T2 IGP3\_T2  
 IGP1\_T3 IGP2\_T3 IGP3\_T3  
 PAP2 PAP1 PAP2\_T2 PAP1\_T2  
 PAP2\_T3 PAP1\_T3  
 REL3R REL4R REL5R  
 REL3R\_T2 REL4R\_T2 REL5R\_T2  
 REL3R\_T3 REL4R\_T3 REL5R\_T3;

MISSING ARE ALL (-999);

Define:

$IGP1 = (IGS5 + IGS10 + IGS9 + IGS3) / 4;$   
 $IGP2 = (IGS6 + IGS8 + IGS2) / 3;$   
 $IGP3 = (IGS7 + IGS4 + IGS1) / 3;$   
 $IGP1\_T2 = (IGS5\_T2 + IGS10\_T2 + IGS9\_T2 + IGS3\_T2) / 4;$

$IGP2\_T2=(IGS6\_T2+IGS8\_T2+IGS2\_T2)/3;$   
 $IGP3\_T2=(IGS7\_T2+IGS4\_T2+IGS1\_T2)/3;$   
 $IGP1\_T3=(IGS5\_T3+IGS10\_T3+IGS9\_T3+IGS3\_T3)/4;$   
 $IGP2\_T3=(IGS6\_T3+IGS8\_T3+IGS2\_T3)/3;$   
 $IGP3\_T3=(IGS7\_T3+IGS4\_T3+IGS1\_T3)/3;$   
 $PAP2=(PANAS2+PANAS8)/2;$   
 $PAP1=(PANAS6+PANAS5)/2;$   
 $PAP2\_T2=(PANAS2\_T2+PANAS8\_T2)/2;$   
 $PAP1\_T2=(PANAS6\_T2+PANAS5\_T2)/2;$   
 $PAP2\_T3=(PANAS2\_T3+PANAS8\_T3)/2;$   
 $PAP1\_T3=(PANAS6\_T3+PANAS5\_T3)/2;$   
 $REL3R=6-DUREL3;$   
 $REL4R=6-DUREL4;$   
 $REL5R=6-DUREL5;$   
 $REL3R\_T2=6-DUREL3\_T2;$   
 $REL4R\_T2=6-DUREL4\_T2;$   
 $REL5R\_T2=6-DUREL5\_T2;$   
 $REL3R\_T3=6-DUREL3\_T3;$   
 $REL4R\_T3=6-DUREL4\_T3;$   
 $REL5R\_T3=6-DUREL5\_T3;$   
 Analysis:  
 estimator = mlr;

#### MODEL:

!Latent Variables  
 InterT1 by IGP1(1)  
 IGP2(2)  
 IGP3(3);  
 PAT1 by PAP1(4)  
 PAP2(5)  
 PANAS10(6);  
 IntRlgT1 by REL3R(7)  
 REL4R(8)  
 REL5R(9);  
 InterT2 by IGP1\_T2(1)  
 IGP2\_T2(2)  
 IGP3\_T2(3);  
 PAT2 by PAP2\_T2(4)  
 PAP1\_T2(5)  
 PANAS10\_T2(6);  
 IntRlgT2 by REL3R\_T2(7)  
 REL4R\_T2(8)  
 REL5R\_T2(9);  
 InterT3 by IGP1\_T3(1)  
 IGP2\_T3(2)  
 IGP3\_T3(3);  
  
 PAT3 by PAP2\_T3(4)  
 PAP1\_T3(5)  
 PANAS10\_T3(6);  
 IntRlgT3 by REL3R\_T3(7)  
 REL4R\_T3(8)

REL5R\_T3(9);

!Correlate items across waves

IGP1 WITH IGP1\_T2 IGP1\_T3;

IGP1\_T2 WITH IGP1\_T3;

IGP2 WITH IGP2\_T2 IGP2\_T3;

IGP2\_T2 WITH IGP2\_T3;

IGP3 WITH IGP3\_T2 IGP3\_T3;

IGP3\_T2 WITH IGP3\_T3;

PAP2\_T3 with PAP2\_T2 PAP2;

PAP2\_T2 WITH PAP2;

PAP1\_T3 with PAP1\_T2 PAP1;

PAP1\_T2 WITH PAP1;

PANAS10 with PANAS10\_T2 PANAS10\_T3;

PANAS10\_T2 WITH PANAS10\_T3;

REL3R\_T3 WITH REL3R\_T2 REL3R;

REL3R\_T2 WITH REL3R;

REL4R\_T3 WITH REL4R\_T2 REL4R;

REL4R\_T2 WITH REL4R;

REL5R\_T3 WITH REL5R\_T2 REL5R;

REL5R\_T2 WITH REL5R;

[InterT1@0 PAT1@0 IntRlgT1@0 InterT2 PAT2 IntRlgT2 InterT3 PAT3 IntRlgT3];

[PANAS10 PANAS10\_T2 PANAS10\_T3](10);

[IGP1 IGP1\_T2 IGP1\_T3](11);

[IGP2 IGP2\_T2 IGP2\_T3](12);

[IGP3 IGP3\_T2 IGP3\_T3](13);

[PAP1 PAP1\_T2 PAP1\_T3](14);

[PAP2 PAP2\_T2 PAP2\_T3](15);

[REL3R REL3R\_T2 REL3R\_T3](16);

[REL4R REL4R\_T2 REL4R\_T3](17);

[REL5R REL5R\_T2 REL5R\_T3](18);

!Autoregressive paths

InterT3 on InterT2;

PAT3 on pat2;

IntRlgT3 on IntRlgT2;

InterT2 on InterT1;

PAT2 on pat1;

IntRlgT2 on IntRlgT1;

GE\_cl\_T2 on GE\_cl\_T1;

GE\_cl\_T3 on GE\_cl\_T2 ;

!Cross-Lagged paths

InterT3 on PAT2

IntRlgT2

GE\_cl\_T2;

PAT3 on InterT2

IntRlgT2

GE\_cl\_T2;

IntRlgT3 on InterT2

PAT2

GE\_cl\_T2;

GE\_cl\_T3 on InterT2

PAT2

IntRlgT2;

InterT2 on PAT1

IntRlgT1

GE\_cl\_T1;

PAT2 on InterT1

IntRlgT1

GE\_cl\_T1;

IntRlgT2 on InterT1

PAT1

GE\_cl\_T1;

GE\_cl\_T2 on InterT1

PAT1

IntRlgT1;

!Fundraising outcome path

fundnew on InterT2

PAT2

IntRlgT2

GE\_cl\_T2

wealth;

!Allow correlation with all DVs

GE\_cl\_T3 with InterT3 PAT3 IntRlgT3;

GE\_cl\_T2 with InterT2 PAT2 IntRlgT2;

GE\_cl\_T1 with InterT1 PAT1 IntRlgT3;

!Covariate paths

PAT1 on wealth;

InterT1 on wealth;

IntRlgT1 on wealth;

GE\_cl\_T1 on wealth;

Output: STDYX MODindices (3.84)



### Complete List of Measures

**Self-Control Scale.** Tangney, Baumeister, & Boone's (2004) scale contains items measuring self-control (e.g., "I am good at resisting temptation") on a 1 (Not at All) to 5 (Very Much) scale. We will use the abbreviated, 13-item version of the scale. (Items included in the brief version are marked with an asterisk in the appendix.)

**3-Factor Patience Questionnaire.** The 11-item 3-Factor Patience Questionnaire (3-FPQ; Schnitker, 2012) will be used as a measure of interpersonal ("My friends would say I'm a very patient friend"), life hardships ("I find it pretty easy to be patient with a difficult life problem or illness"), and daily hassles ("Although they're annoying, I don't get too upset when stuck in a traffic jam") patience. Items are rated from 1 = Not like me at all to 5 = Very Much Like Me.

**General Regulatory Behavior Questionnaire.** A questionnaire was developed based on Oaten and Cheng's (2004) study items measuring everyday regulatory behaviors, including cigarette smoking, alcohol and caffeine consumptions, dietary habits, self-care habits, spending habits, emotion control, study habits, obeying rules, use of social media, energy conservation, and turning in assignments. Participants were asked to rate how often they engaged in behaviors in the past week on a scale from 9 (not at all) to 5 (almost always).

**Emotion Regulation.** Emotion regulation of participants will be assessed using three subscales (i.e., 4-item anger regulation coping, 4-item emotion regulation inhibition, and 3-item dysregulated expression) from the Children's Sadness and Anger Management Scale (Zeman, Shipman, & Penza-Clyve, 2001). Participants will report on sadness and anger. A sample item follows: "When I am feeling mad, I control my temper" (anger/sadness regulation coping), "I hide my anger/sadness" (inhibition), and "I attack whatever it is that makes me mad." (dysregulated coping). The response choices follow: 0 = "not true," 1 = "somewhat true," 2 = "very true".

**Interpersonal Generosity Scale.** The 10-item Interpersonal Generosity scale (Smith, & Hill, 2009) will be used as a measure of generosity. The items measure six identifiable dimensions of interpersonal generosity: attention ("I am known by family and friends as someone who makes time to pay attention to others' problems"), compassion ("When friends or family members experience something upsetting or discouraging, I make a special point of being kind to them"), open-handedness ("When it comes to my personal relationships with others, I am a very generous person"), self-extension ("My decisions are often based on concern for the welfare of others"), courage ("I am usually willing to risk my own feelings being hurt in the process if I stand a chance of helping someone else in need"), and verbal expression ("I make it a point to let my friends and family know how much I love and appreciate them") on a 1 (Strongly Disagree) to 6 (Strongly Agree) scale.

**Duke University Religious Index (DUREL).** The Duke University Religion Index (DUREL; Koenig & Bussing, 2010) is a five-item measure of religious involvement that includes dimensions of religiosity (organizational religious activity, non-organizational religious activity, and intrinsic religiosity). Organizational religious activity (ORA; How often do you attend church or other religious meetings?) and non-organizational religious activity (NORA; How often do you spend time in private religious activities, such as prayer, meditation or Bible?) are both rated on a 6-point scale. For ORA the response choice is as follows: 1 - Never; 2 - Once a year or less; 3 - A few times a year; 4 - A few times a month; 5 - Once a week; 6 - More than once/week; while, NORA includes: 1 - Rarely or never; 2 - A few times a month; 3 - Once a week; 4 - Two or more times/week; 5 - Daily; 6 - More than once a day. Intrinsic religiosity is measured based on three items (e.g. In my life, I experience the presence of the Divine (i.e., God) and the response choices are 1 - Definitely not true; 2 - Tends not to be true; 3 - Unsure; 4 - Tends to be true; 5 - Definitely true of me.

**Spiritual Transcendence Index.** The 8-item Spiritual Transcendence Index (STI; Seidlitz et. al, 2002) measured the meaning and quality of a participant's spirituality using a 6-point Likert scale (1 = Strongly disagree to 6 = Strongly agree) on items such as, "Maintaining my spirituality is a priority for me."

**God Concept Questions.** Based on Laurin, Kay, and Fitzsimons (2012), perceptions of God's sovereignty and watchfulness. Perceptions of God's sovereignty will be rated from 1 to 5 based on the degree to which the person conceives of God as in control of their success or failure in life. "My

future success in life depends...(1) completely on factors God controls (2) mostly on factors that God controls (3) equally on factors that God and I control (4) mostly on factors that I control (5) completely on factors I control. Perceptions of God watching will be rated from 1 to 5 on a Likert scale. "If God (or some non-human spiritual being) exists, it is likely that God watches peoples' behavior and notices when they misbehave." Additionally, the monitoring by God subscale (3 items) based on Carter, McCullough & Carver (2012) will also be used. Ratings will be based on a 1 (Not at all) to 7 (Very true) scale and include items such as "I believe a higher power can see my behavior."

**Satisfaction with Life Scale.** This 5-item scale (Diener, Emmons, Larsen, & Griffin, 1985) measures global satisfaction with life. Items such as "In most ways, my life is close to my ideal" are rated on a scale from 1 (strongly disagree) to 7 (strongly agree).

**Youth Risk Behavior Surveillance.** Participants will be administered 16 items selected from Youth Risk Behavior Surveillance measure utilized by Center for Disease control (Foti, Balaji, & Shanklin, 2011). Items to be administered relate to tobacco, alcohol, and marijuana use, dietary habits, exercise activities, safe driving, and media/technology use.

**Positive and Negative Affect Schedule.** The shortened version of the PANAS-C (Ebesutani et al., 2012; Laurent, et al. 1999) will be used that includes 5-item PA scale (joyful, cheerful, happy, lively, proud) and a 5-item NA scale (miserable, mad, afraid, scared, sad) rated on a 1 (very slightly or not at all) to 5 (extremely) scale.

**Group Entitativity Measure.** The GEM-in (Gaertner & Schopler, 1998) measures perceived interconnections between self and others. Test-takers choose between 6 different pictures of the self and others (pictorially represented by circles). The first picture has the greatest distance between self and others, while the last picture shows no distance between self and others, so that the group and self are completely overlapping. Pictures at each of the 3 levels of distance also manipulated whether the circle representing the self was seen as central vs. periphery to the group. Participants will be instructed to complete the measure relative to their athletic teams/extracurricular activity group (alternative instructions).

**Performances and Motivation Orientation.** To assess participants instrumental, moral, and spiritual motivations for training, we will ask them to rate the extent to which they are motivated to train with Team World Vision because of opportunities to improve physical fitness, raise money for clean water, and grow spiritually. At later time points, we will ask participants the extent to which they change in each of these domains as a result of training. Ratings will be made on a 1 (Not at all true of me) to 5 (Always true for me) scale.

**Contingencies of Self-worth.** Further, participants will report on 3 subscales of contingencies of self worth rated on a 1 (Strongly disagree) to 7 (Strongly agree) and each subscale has 5 items (Crocker et al., 2003; competition, virtue, God's love). Participants will rate Competition contingencies will include statements such as "my self-worth is affected by how well I do when I am competing with others". Virtue contingencies includes statements like "I couldn't respect myself if I didn't live up to a moral code" and "When I think that I am disobeying God, I feel bad about myself" for God's love contingencies.

**Fundraising and training outcomes.** Data will be collected directly from Team World Vision documenting participant fundraising. To assess sponsorship trends, participants will note their involvement in sponsorships programs before and after training for either the half or full marathon. Participants will also be asked to note how frequently they participated in TWV group runs.

Demographics.
